# Supplementary material
Source: publisher site journal article supplement (https://www.dovepress.com/article/357561)
Supplement: Supplementary file 1 [file get_supplementary_file.php]

## Supplementary Data

**Literature Search Databases:**

PUBMED: <https://pubmed.ncbi.nlm.nih.gov/>

Web of Science: <https://clarivate.com/webofsciencegroup/solutions/web-of-science/>

**Search Terms:**

**(Healthcare OR Health Care OR Hospital) AND (Key Performance Indicator Selection Process OR Quality Indicator Selection Process OR Metric Selection Process) AND (Canada OR United States OR United Kingdom OR Sweden OR Switzerland OR The Netherlands OR Norway OR Germany OR France OR Australia OR New Zealand) AND (Emergency OR Surgery OR Maternity OR Critical Care OR Intensive Care OR Cancer OR cardio or Medicine OR Infection OR Pediatrics OR Mental Health OR Psychiatry OR Hospital OR Patient Safety)**

**Grey Literature Search: International Health Policy Institute Websites**

| **Country** | **Institutes** | **Website** |
| --- | --- | --- |
| Australia | Australian Commission on Healthcare Quality and Safety | <https://www.safetyandquality.gov.au/> |
| Australian Healthcare and Hospitals Association | <https://ahha.asn.au/publication> |
| Canada | Canadian Patient Safety Institute | [www.patientsafetyinstitute.ca](http://www.patientsafetyinstitute.ca/) |
| Canadian Institute for Health Information | [www.cihi.ca](http://www.cihi.ca/) |
| Ontario Hospital Association | [www.oha.com](http://www.oha.com/) |
| France | Haute Autorite de Sante | [https://www.has-sante.fr](https://www.has-sante.fr/) |
| Germany | The independent Institute for Quality and Efficiency in Health Care | <https://www.iqwig.de/en/home.2724.html> |
| Netherlands | Danish Society for Patient Safety | <https://patientsikkerhed.dk/english/> |
| New Zealand | Health Quality & Safety Commission New Zealand | <https://www.hqsc.govt.nz/> |
| Norway | Norwegian Institute of Public Health | <https://www.fhi.no/en/qk/healthservice-quality/> |
| Sweden | The Swedish Institute for Health Economic | <https://ihe.se/> |
| Switzerland | Federal Office of Public Health on the quality and safety of healthcare in Switzerland | https://www.bag.admin.ch/bag/en/home.html |
| United Kingdom | The King's Fund | https://www.kingsfund.org.uk/ |
| Health Foundation | <https://www.health.org.uk/> |
| Nuffield Trust | https://www.nuffieldtrust.org.uk/ |
| National Institute for Health and Clinical Excellence (NICE) | <https://www.nice.org.uk/> |
| NHS | https://www.nhs.uk/ |
| United States | Institute for Healthcare Improvement | http://www.ihi.org/ |
| Agency for Healthcare Research and Quality | <https://www.ahrq.gov/> |
| National Quality Forum | [http://www.qualityforum.org](http://www.qualityforum.org/) |
| American Hospital Association | https://www.aha.org/ |
| National Academy of Medicine (Institute of Medicine) | <https://nam.edu/> |
| Commonwealth Fund | <https://www.commonwealthfund.org/> |
| Hospital Association of NY State (HANYS) | [https://www.hanys.org](https://www.hanys.org/) |
